# Supplementary material
Source: ML conference proceedings conference paper supplement (https://openaccess.thecvf.com/content/WACV2022/html/Wang_Channel_Pruning_via_WACV_2022_paper.html)
Supplement: Supplementary file 1 [file Wang_Channel_Pruning_via_WACV_2022_supplemental.pdf]

# Supplementary Material

## 1. Structure of the policy network

We use a VGG-16 style architecture as our policy network. Different from the vanilla VGG-16, which is designed for image classification, we use 1D convolution instead. The detailed architecture of the policy network is presented in Table 1.

Table 1: The network architecture of the policy network.  $N$  is the number of filters in the CNN to be pruned.

| Index | Layer   | Type         | Feature map | Kernel size  | Stride | Output size         | Activation |
|-------|---------|--------------|-------------|--------------|--------|---------------------|------------|
| 0     | Input   | Feature      | 1           | -            | -      | $N \times 7$        | -          |
| 1     | conv1_1 | 1D conv      | 64          | $3 \times 3$ | 1      | $N \times 64$       | ReLu       |
| 2     | conv1_2 | 1D conv      | 64          | $3 \times 3$ | 1      | $N \times 64$       | ReLu       |
| 3     | pool1   | Pool         | -           | $2 \times 2$ | 2      | $(N/2) \times 64$   | Max        |
| 4     | conv2_1 | 1D conv      | 128         | $3 \times 3$ | 1      | $(N/2) \times 128$  | ReLu       |
| 5     | conv2_2 | 1D conv      | 128         | $3 \times 3$ | 1      | $(N/2) \times 128$  | ReLu       |
| 6     | pool2   | Pool         | -           | $2 \times 2$ | 2      | $(N/4) \times 128$  | Max        |
| 7     | conv3_1 | 1D conv      | 256         | $3 \times 3$ | 1      | $(N/4) \times 256$  | ReLu       |
| 8     | conv3_2 | 1D conv      | 256         | $3 \times 3$ | 1      | $(N/4) \times 256$  | ReLu       |
| 8     | conv3_3 | 1D conv      | 256         | $3 \times 3$ | 1      | $(N/4) \times 256$  | ReLu       |
| 10    | pool3   | Pool         | -           | $2 \times 2$ | 2      | $(N/8) \times 256$  | Max        |
| 11    | conv4_1 | 1D conv      | 512         | $3 \times 3$ | 1      | $(N/8) \times 512$  | ReLu       |
| 12    | conv4_2 | 1D conv      | 512         | $3 \times 3$ | 1      | $(N/8) \times 512$  | ReLu       |
| 13    | conv4_3 | 1D conv      | 512         | $3 \times 3$ | 1      | $(N/8) \times 512$  | ReLu       |
| 14    | pool4   | Pool         | -           | $2 \times 2$ | 2      | $(N/16) \times 512$ | Max        |
| 15    | conv5_1 | 1D conv      | 512         | $3 \times 3$ | 1      | $(N/16) \times 512$ | ReLu       |
| 16    | conv5_2 | 1D conv      | 512         | $3 \times 3$ | 1      | $(N/16) \times 512$ | ReLu       |
| 17    | conv5_3 | 1D conv      | 512         | $3 \times 3$ | 1      | $(N/16) \times 512$ | ReLu       |
| 18    | pool5   | Pool         | -           | $2 \times 2$ | 2      | $(N/32) \times 512$ | Max        |
| 19    | fc6_1   | fc ( $\pi$ ) | -           | -            | -      | $N$                 | Softmax    |
| 19    | fc6_2   | fc ( $v$ )   | -           | -            | -      | 1                   | Tanh       |

## 2. Pseudocodes of key components in our approach.

---

**Algorithm 1** Get the improved policy  $\pi$  after MCTS search: `getPolicyPi( $s_i$ )`

---

**Input:** Current configuration of the network to be pruned  $s_i$ , number of MCTS simulations per action  $n_{mcts}$ , total number of filters in the network to be pruned  $n_f$ , temperature  $\tau$ .

**Output:**  $\pi_i$

```
1: for  $i$  in range( $n_{mcts}$ ) do
2:   MCTS( $s_i$ )
3: Get  $N(s_i, a)$  after MCTS simulations.
4: if  $\tau = 0$  then
5:   bestAction =  $\operatorname{argmax}_a N(s_i, a)$ 
6:    $\pi[\text{bestAction}] = 1$ 
7: else
8:    $\pi = \frac{N(s_i, a)^{(1/\tau)}}{\sum_b N(s_i, b)^{(1/\tau)}}$ 
return  $\pi$ 
```

---

---

**Algorithm 2** Get training samples from a single iteration: `getTrainSamples( $s_0$ )`

---

**Input:** The raw network to be pruned  $s_0$ , pruning ratio  $\gamma$ , trainingAccBaseline  $b$ ,

**Output:** trainSamples ( $s_i, \pi_i, v$ )

```
1:  $t = 0, s_t = s_0$ 
2: trainSamples = []
3: while  $\text{FLOPs}(s_t)/\text{FLOPs}(s_0) > \gamma$  do
4:    $\pi_t = \text{getPolicyPi}(s_t)$ 
5:   trainSamples.append( $[s_t, \pi_t]$ )
6:   nextAction = randomChoice( $\pi_t$ )
7:    $s_{t+1} = \text{pruneFilter}(s_t, \text{nextAction})$ 
8:    $t = t + 1$ 
9: if  $\text{trainAcc}(s_t) > b$  then
10:   $v = 1$ 
11: else
12:   $v = -1$ 
13: trainSamples =  $[(x[0], x[1], v)$  for  $x$  in trainSamples]
14: return trainSamples
```

---

---

**Algorithm 3** Learn to get the slimmed CNN with RL and MCTS

---

**Input:** The raw network to be pruned  $s_0$ , neural network for pruning action selection  $f_\theta$ , number of self-play simulations  $n_{sim}$ , maximum training queue length  $L$ .

**Output:** The optimal slimmed CNN  $s_p$

```
1: totalTrainingQueue = []
2: while stopCounter <  $n_s$  do
3:   for  $i$  in range( $n_{sim}$ ) do
4:     Initialize MCTS
5:     trainingSamples = getTrainSamples( $s_0$ )
6:     if len(totalTrainingQueue) >  $L$  then
7:       totalTrainingQueue.pop()
8:     totalTrainingQueue += trainingSamples
9:      $f_\theta = \text{RLTrain}(\text{totalTrainingQueue}, f_\theta)$ 
10:    Get the slimmed network  $s'$  by pruning  $s_0$  with  $f_\theta$ 
11:    if trainAcc( $s'$ ) >  $b$  then
12:       $b = \text{trainAcc}(s')$ 
13:       $s_p = s'$ 
14:      stopCounter = 0
15:    else
16:      stopCounter += 1
17: return  $s_p$ 
```

---
